# Supplementary material
Source: Springer Nature journal article supplement (https://www.springermedizin.de/resource/supplementary/13011_2014_307_MOESM1_ESM.pdf/9628836)
Supplement: MOESM1 [file 9628836]

## Scientific literature

Scientific literature database search  
N=3,908

Abstracts and papers excluded  
through screening  
N=3,894

Final papers included  
N=14

## Grey literature

Grey literature database search  
N=610

Reports excluded  
through screening  
N=605

Final papers included  
N=5

Final papers included in  
scoping study  
N=19

```
graph TD; S1[Scientific literature database search  
N=3,908] --> S2[Abstracts and papers excluded  
through screening  
N=3,894]; S2 --> S3[Final papers included  
N=14]; G1[Grey literature database search  
N=610] --> G2[Reports excluded  
through screening  
N=605]; G2 --> G3[Final papers included  
N=5]; S3 --> S4[Final papers included in  
scoping study  
N=19]; G3 --> S4;
```
